# Supplementary material for: The Modular Architecture of Metallothioneins Facilitates Domain Rearrangements and Contributes to Their Evolvability in Metal-Accumulating Mollusks
Source: MDPI journal article supplement (doi:10.3390/ijms232415824), 2022-12-13
Supplement: s1 [file s1]

SUPPLEMENTARY MATERIAL

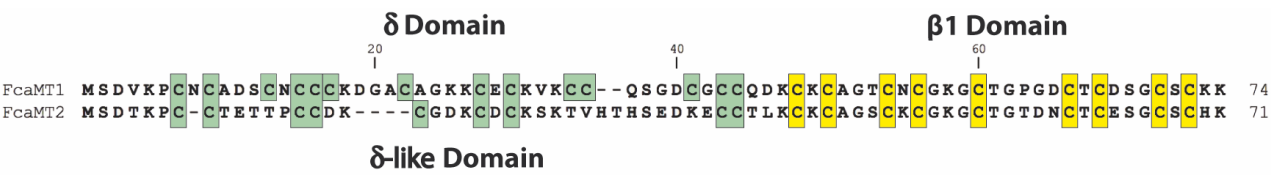

**Supplementary Figure S1.** Amino acid alignment of *Falcidens caudatus* MTs displaying a bidomain structure, δβ1 for FcaMT1 and δ-likeβ1 for FcaMT2. Cysteines are highlighted in yellow for the β1 domain, and in green for the δ (above) and δ-like (below).
